# Supplementary material for: Guiding functions of the C-terminal domain of topoisomerase IIα advance mitotic chromosome assembly
Source: PubMed Central journal article supplement (PMC8131626; doi:10.1038/s41467-021-23205-w), 2021-05-18
Supplement: 41467_2021_23205_MOESM1_ESM.pdf [file 41467_2021_23205_MOESM1_ESM.pdf]

Supplementary information for

**Guiding functions of the C-terminal domain of topoisomerase II $\alpha$   
advance mitotic chromosome assembly**

**Keishi Shintomi and Tatsuya Hirano**

**This PDF includes:**

Supplementary Figures 1-3

Supplementary Table 1

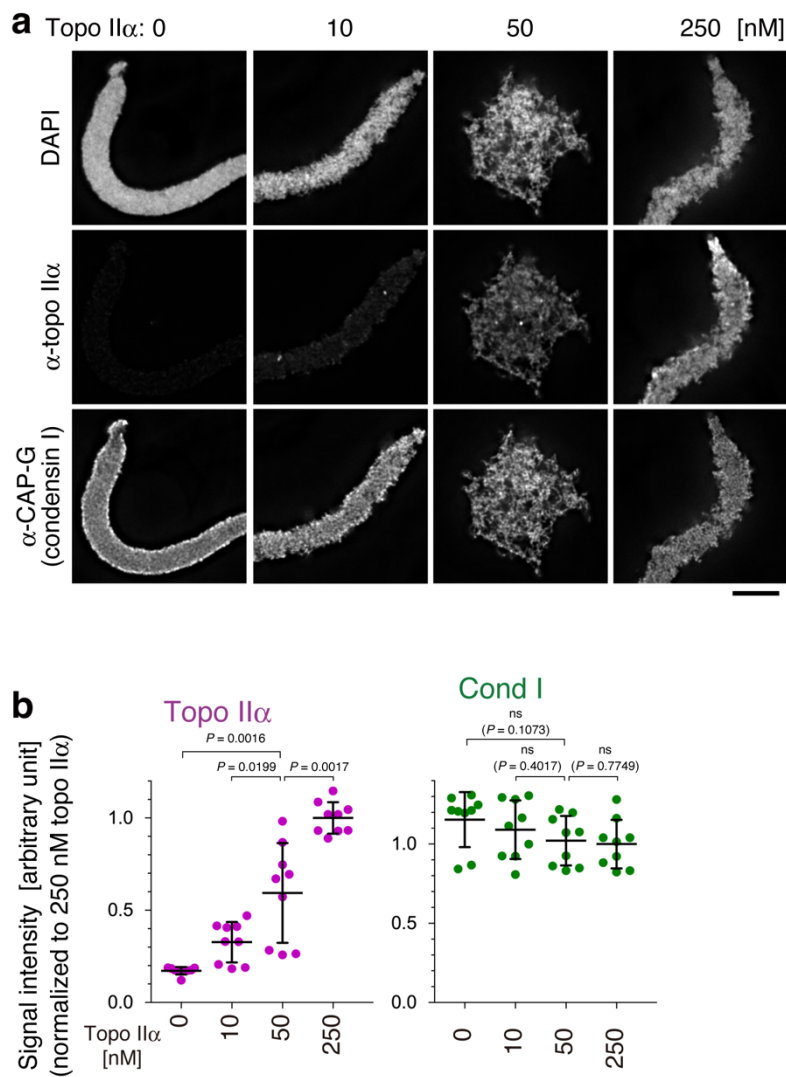

**Supplementary Fig 1. Titration of recombinant *Xenopus* topo II $\alpha$  in the mitotic chromatid reconstitution assay. a, b.** Chromatid reconstitution assays were performed using increasing concentrations of *Xenopus* topo II $\alpha$  and fixed concentrations of the other five proteins (condensin I, a truncation version of histone H2A.XF-H2B dimer, Npm2, Nap1, and FACT). After a 150-min incubation, the resultant structures were fixed and immunolabeled with antibodies against topo II $\alpha$  and CAP-G. DNA was counterstained with DAPI (a). Quantitative analyses of the signal intensities were carried out as in Fig. 1. The mean  $\pm$  s.d. is shown ( $n=9$  clusters of chromatin).  $P$  values were assessed by two-tailed Welch's  $t$ -test (ns, not significant) (b). Bar, 5  $\mu$ m.

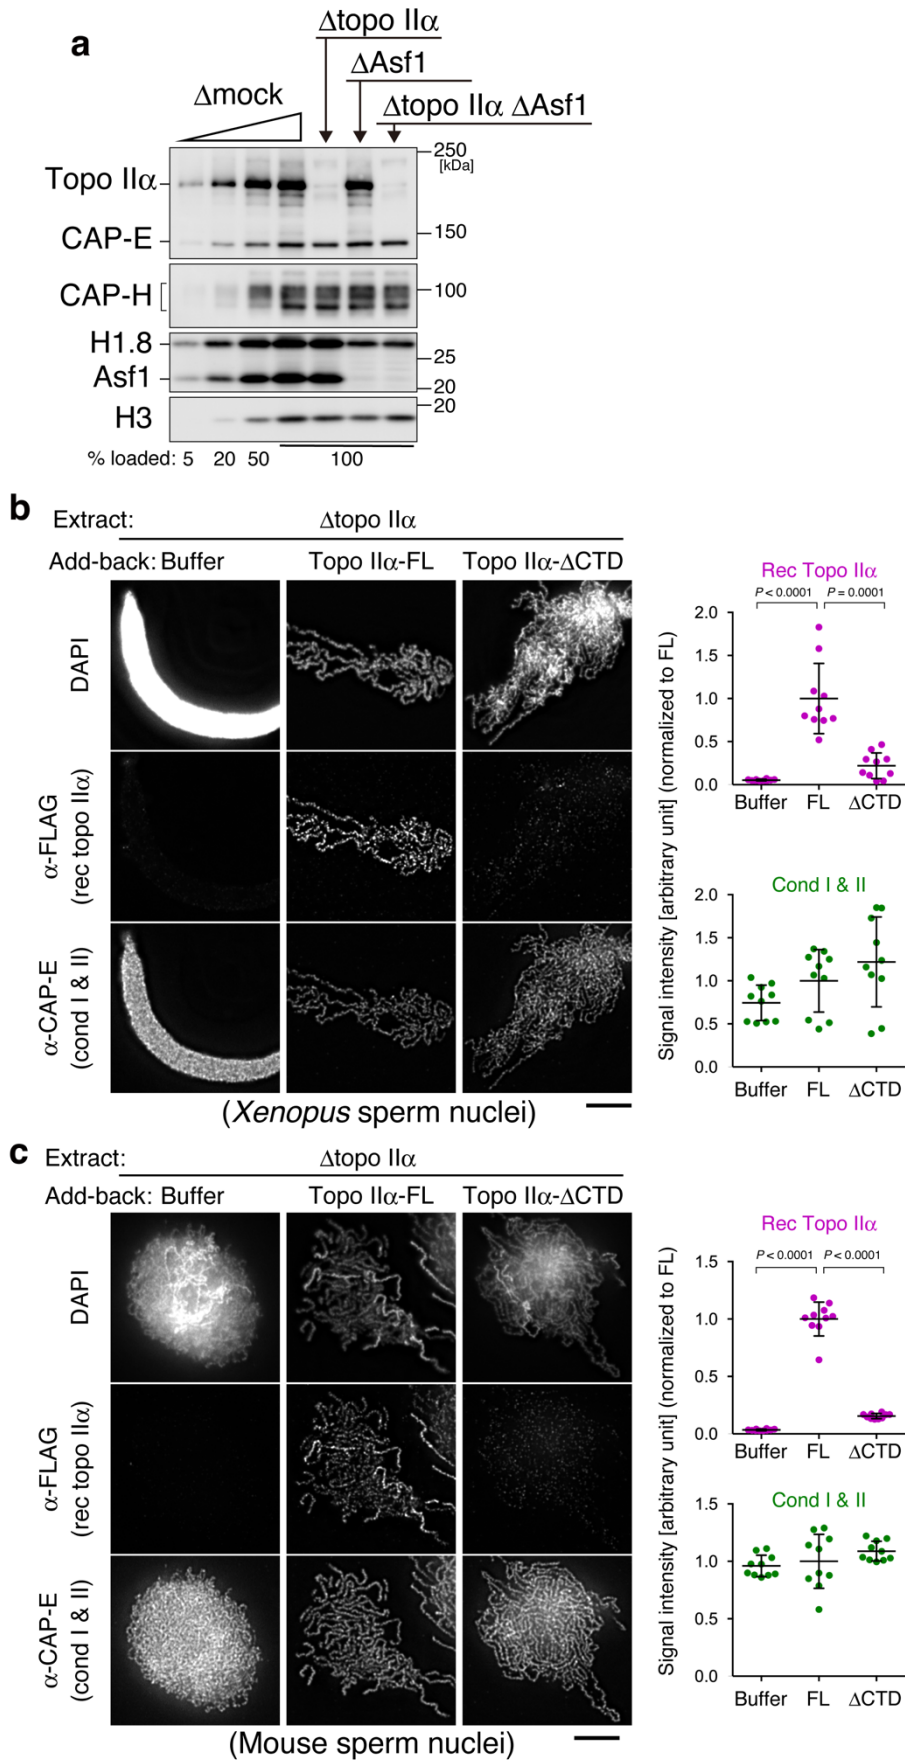

**Supplementary Fig 2. Topo II $\alpha$ - $\Delta$ CTD is proficient in chromatid individualization, but is deficient in chromatid thickening in *Xenopus* egg cell-free extracts.** **a.** Mitotic egg extracts were immunodepleted with a control rabbit IgG ( $\Delta$ mock), anti-topo II $\alpha$  antibody ( $\Delta$ topo II $\alpha$ ), anti-Asf1 antibody ( $\Delta$ Asf1), or a combination of anti-topo II $\alpha$  and anti-Asf1 ( $\Delta$ topo II $\alpha$   $\Delta$ Asf1). To estimate the efficiency of depletion, an aliquot of each extract along with decreasing amounts of the  $\Delta$ mock extract was analyzed by immunoblotting with the antibodies indicated. Note that neither condensin subunits (CAP-E and CAP-H) nor histone H3 was depleted after each depletion while a sizable portion (50~80%) of the linker histone H1.8 was co-depleted with anti-Asf1 antibody (i.e., in the  $\Delta$ Asf1 and  $\Delta$ topo II $\alpha$   $\Delta$ Asf1 extracts). This experiment was repeated independently at three times with similar results. **b.** *Xenopus* sperm nuclei were added to egg extracts depleted of topo II $\alpha$  ( $\Delta$ topo II $\alpha$ ) that had been supplemented with buffer, topo II $\alpha$ -FL, or topo II $\alpha$ - $\Delta$ CTD. After a 150-min incubation, the samples were fixed and processed for immunofluorescence and analyzed. Quantitative analyses of the signal intensities were carried out as in Fig. 1. The mean  $\pm$  s.d. is shown ( $n=12$  clusters of chromatin).  $P$  values were assessed by two-tailed Welch's  $t$ -test. **c.** Mouse sperm nuclei were used in the same experiment as shown above. The mean  $\pm$  s.d. is shown ( $n=12$  clusters of chromatin).  $P$  values were assessed by two-tailed Welch's  $t$ -test. Bars, 5  $\mu$ m.

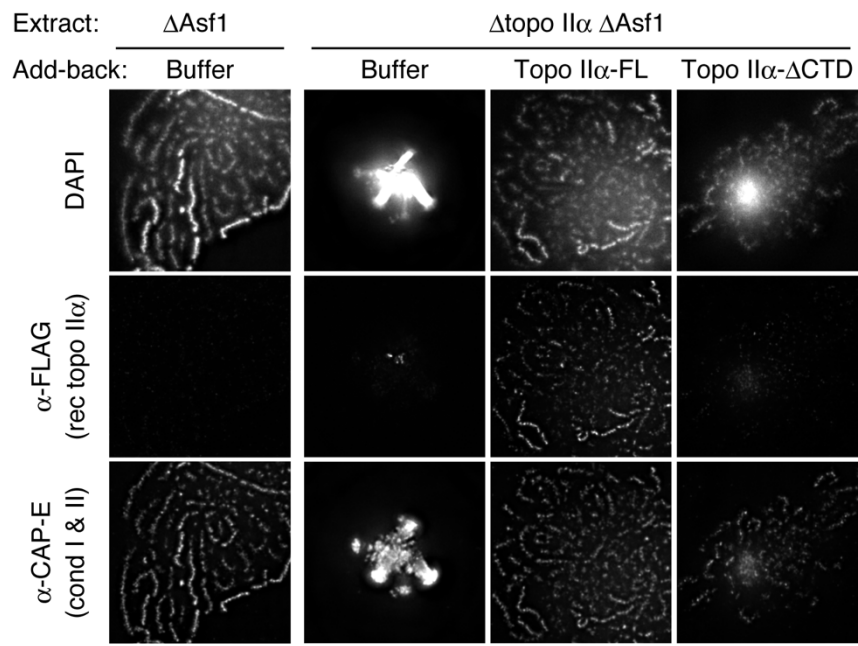

**Supplementary Fig 3. Topo II $\alpha$ -FL, but not topo II $\alpha$ - $\Delta$ CTD, can fully rescue the defects observed in the extracts depleted of both topo II $\alpha$  and Asf1 (topo II $\alpha$  and CAP-E labeling).**

Mouse sperm nuclei were added to egg extracts depleted of topo II $\alpha$  and Asf1 ( $\Delta$ topo II $\alpha$   $\Delta$ Asf1) that had been supplemented with buffer, topo II $\alpha$ -FL, or topo II $\alpha$ - $\Delta$ CTD. After a 150-min incubation, the samples were fixed and processed for immunolabeling with the antibodies indicated. As a reference, nucleosome-depleted chromatids were assembled in an extract depleted of Asf1 ( $\Delta$ Asf1) that contained endogenous topo II $\alpha$ . This experiment was repeated independently at three times with similar results. Bar, 5  $\mu$ m.

**Supplementary Table 1. The list of primers used in this study.**

| Identifier  | Sequence                                             | Note                                                                                                      |
|-------------|------------------------------------------------------|-----------------------------------------------------------------------------------------------------------|
| <b>KB87</b> | <u>GACGATGACAAGCCC</u> GAGACCGAACC<br>TTTGCAGCCTC    | PCR (topo II $\alpha$ -FL and - $\Delta$ CTD), forward, <u>overlapping sequence A</u> for Gibson assembly |
| <b>KB88</b> | CAGAACTTCCAGCCC <u>AAAGTCATCGT</u><br>CAGAATCCTCCAGG | PCR (topo II $\alpha$ -FL), reverse, <u>overlapping sequence B</u> for Gibson assembly                    |
| <b>KB89</b> | CAGAACTTCCAGCCC <u>AAATTTCTGCA</u><br>ACTGCATTTTC    | PCR (topo II $\alpha$ - $\Delta$ CTD), reverse, <u>overlapping sequence B</u> for Gibson assembly         |
| <b>KA28</b> | AAATGATAACCATCTCGC                                   | Sequencing (pXR504, 505, and 506)                                                                         |
| <b>KA29</b> | GAAATTTGTGATGCTATTGC                                 | Sequencing (pXR504, 505, and 506)                                                                         |
| <b>KU27</b> | AAGATTAAGCCATTTGAGGG                                 | Sequencing (pXR505 and 506)                                                                               |
| <b>KU28</b> | GTCGTGGCTGAGCAATACGC                                 | Sequencing (pXR505)                                                                                       |
| <b>KU31</b> | CAACATCATCAAGATCGTGGG                                | Sequencing (pXR505 and 506)                                                                               |
| <b>KU32</b> | TTCCAAAATGAATCTGGCTTGG                               | Sequencing (pXR505 and 506)                                                                               |
| <b>KU33</b> | ATGTCTGCATACCATCATGGTG                               | Sequencing (pXR505 and 506)                                                                               |
| <b>KU34</b> | TGTCGAGCACAGACACCTCACC                               | Sequencing (pXR505 and 506)                                                                               |
| <b>KU35</b> | GTAAAGAAAATGCAGTTGCAGG                               | Sequencing (pXR505 and 506)                                                                               |
| <b>KU36</b> | CTTTATGCAGGACATAGTTGGG                               | Sequencing (pXR505 and 506)                                                                               |
| <b>KU37</b> | GATACTCCCATCATGATCAGTGC                              | Sequencing (pXR505)                                                                                       |
| <b>KB90</b> | GAGTACCACACTGATACCAC                                 | Sequencing (pXR505 and 506)                                                                               |
| <b>KB91</b> | TCGCTTCTTGGCTGCTGCAG                                 | Sequencing (pXR505)                                                                                       |
| <b>KB92</b> | CCCTGCGGTCTTGCATGAAG                                 | Sequencing (pXR505 and 506)                                                                               |
| <b>KB93</b> | GTGGGAATACCCATAGCG                                   | Sequencing (pXR505 and 506)                                                                               |
| <b>KB94</b> | GATCATTCACCTGCTCGTGC                                 | Sequencing (pXR505 and 506)                                                                               |
